# Supplementary material
Source: HighWire-hosted journal article supplement (https://emj.bmj.com/content/39/12/903)

Supplementary file 6

Y-axis:  
AORs on ICU/MCU admission

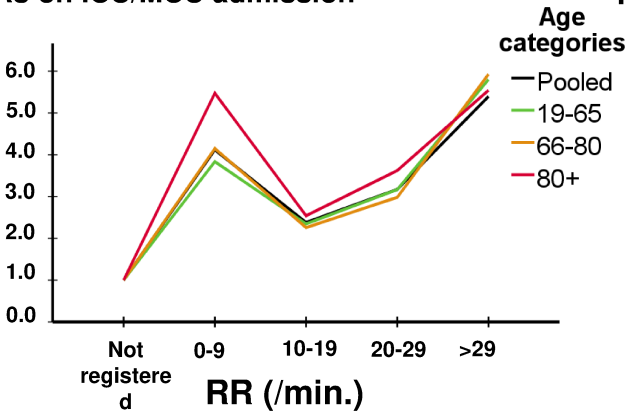

Y-axis:  
Predicted ICU/MCU admission

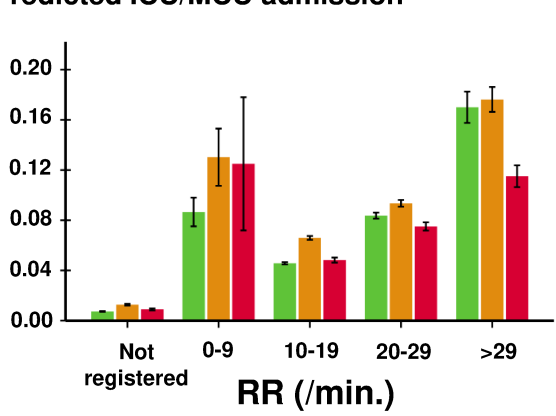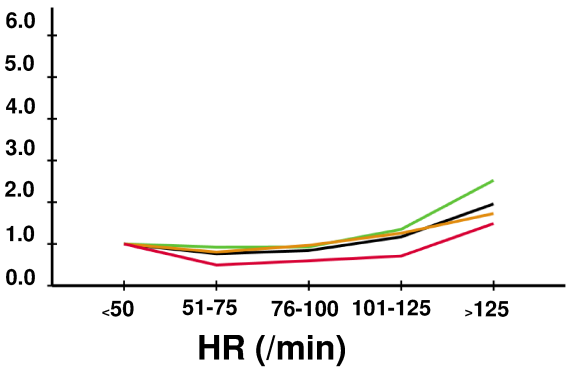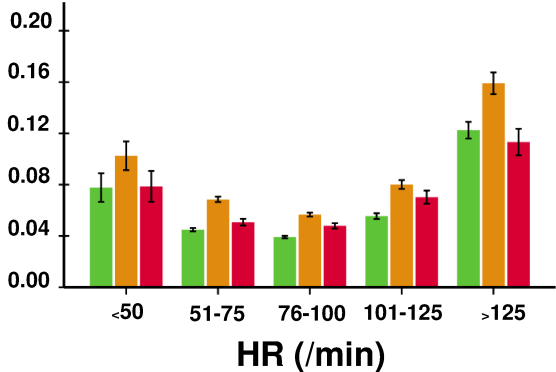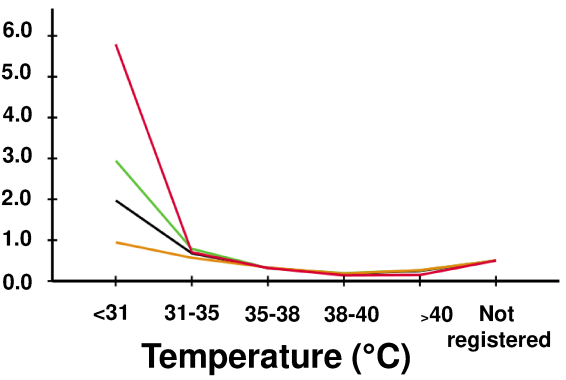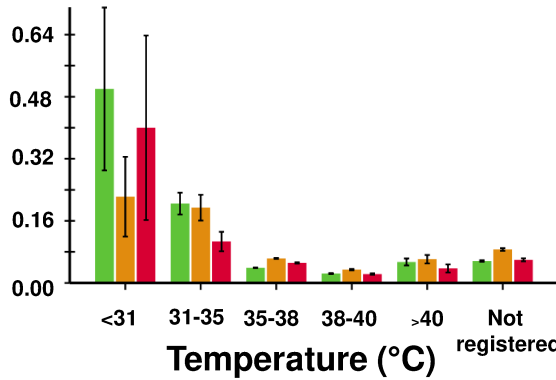

Supplement: inline-supplementary-material-6 [file inline-supplementary-material-6.pdf]
